# Supplementary material
Source: Springer Nature journal article supplement (https://www.springermedizin.de/resource/supplementary/12979_2008_58_MOESM2_ESM.pdf/9603270)
Supplement: MOESM2 [file 9603270]

| young |                                                                                                       |  | middle-aged |                                                                                                      |  | elderly |                                                                                                      |
|-------|-------------------------------------------------------------------------------------------------------|--|-------------|------------------------------------------------------------------------------------------------------|--|---------|------------------------------------------------------------------------------------------------------|
| donor | sequence CDR3                                                                                         |  | donor       | sequence CDR3                                                                                        |  | donor   | sequence CDR3                                                                                        |
| Y-1   | CASS~~SANYGYT~~~~~FGS<br>CASS~~SANYGYT~~~~~FGS<br>CASS~~SANYGYT~~~~~FGS<br>CASS~~SANYGYT~~~~~FGS      |  | M-1         | CAPR~~VHTGELF~~~~~FGE<br>CAPR~~VHTGELF~~~~~FGE<br>CAPR~~VHTGELF~~~~~FGE<br>CAPR~~VHTGELF~~~~~FGE     |  | E-1     | CASS~~LVGTGGSYEQY~~~FGP<br>CASS~~HSRDSYNEQF~~~FGP<br>CASS~~HSRDSYNEQF~~~FGP<br>CASS~~PYGQFYEQY~~~FGP |
| Y-2   | CASS~~SATYGYT~~~~~FGS<br>CASS~~SATYGYT~~~~~FGS<br>CASS~~SATYGYT~~~~~FGS<br>CASS~~SATYGYT~~~~~FGS      |  | M-2         | CASS~~SVNEQY~~~~~FGP<br>CASS~~SVNEQY~~~~~FGP<br>CASS~~SVNEQY~~~~~FGP<br>CASS~~SVNEQY~~~~~FGP         |  | E-2     | CASS~~PGNILYGYT~~~FGS<br>CASS~~PGNILYGYT~~~FGS<br>CASS~~PGNILYGYT~~~FGS<br>CASS~~PGNILYGYT~~~FGS     |
| Y-3   | CASS~~SANYGYT~~~~~FGS<br>CASS~~LTGQETQY~~~~~FGP<br>CASS~~VGGPYTGELF~~~FGE<br>CASS~~VGGPYTGELF~~~FGE   |  | M-3         | CASS~~SVNEQY~~~~~FGP<br>CASS~~SVNEQY~~~~~FGP<br>CASS~~SVNEQY~~~~~FGP<br>CASS~~SVNEQY~~~~~FGP         |  | E-3     | CASS~~SASYGYT~~~~~FGP<br>CASS~~SASYGYT~~~~~FGP<br>CASS~~SASYGYT~~~~~FGP<br>CASS~~SASYGYT~~~~~FGP     |
| Y-4   | CASS~~QWSNEKLF~~~~~FGS<br>CASS~~QWSNEKLF~~~~~FGS<br>CASS~~QWSNEKLF~~~~~FGS<br>CASS~~SANYGYT~~~~~FGS   |  | M-4         | CASS~~SANYGYT~~~~~FGS<br>CASS~~SANYGYT~~~~~FGQ<br>CASS~~LIGGRNGYT~~~~~FGQ<br>CASS~~LIGGRNGYT~~~~~FGQ |  | E-4     | CASS~~SANYGYT~~~~~FGS<br>CASS~~SANYGYT~~~~~FGS<br>CASS~~SANYGYT~~~~~FGS<br>CASS~~SANYGYT~~~~~FGS     |
| Y-5   | CASS~~SASYGYT~~~~~FGS<br>CASS~~SANYGYT~~~~~FGS<br>CASS~~SANYGYT~~~~~FGS<br>CASS~~SANYGYT~~~~~FGS      |  | M-5         | CASS~~SAFYGYT~~~~~FGS<br>CASS~~SVNGAF~~~~~FGQ<br>CASS~~SVNEAF~~~~~FGQ<br>CASS~~SVNGAF~~~~~FGQ        |  | E-5     | CASS~~SASYGYT~~~~~FGS<br>CASS~~PGNILYGYT~~~FGS<br>CASS~~SASYGYT~~~~~FGS<br>CASS~~SASYGYT~~~~~FGS     |
| Y-6   | CASS~~ANLAGDYNEQF~~~FGP<br>CASS~~LDVDSYNEQF~~~FGP<br>CASS~~SLTGTGYNEQF~~~FGP<br>CASS~~SANYGYT~~~~~FGS |  | M-6         | CASS~~SANYGYT~~~~~FGS<br>CASS~~SANYGYT~~~~~FGS<br>CASS~~STTGYT~~~~~FGS<br>CASS~~STTGYT~~~~~FGS       |  | E-6     | CASS~~VVGGRYGYT~~~FGS<br>CASS~~VVGGRYGYT~~~FGS<br>CASS~~VVGGRYGYT~~~FGS<br>CASS~~VVGGRYGYT~~~FGS     |
| Y-7   | CASS~~SANYGYT~~~~~FGS<br>CASS~~SANYGYT~~~~~FGS<br>CASS~~SANYGYT~~~~~FGS<br>CASS~~SANYGYT~~~~~FGS      |  |             |                                                                                                      |  | E-7     | CASS~~SVNEAF~~~~~FGQ<br>CASS~~SVNEAF~~~~~FGQ<br>CASS~~SVNEAF~~~~~FGQ<br>CASS~~SVDEAF~~~~~FGQ         |
| Y-8   | CASS~~SANYGYT~~~~~FGS<br>CASS~~SANYGYT~~~~~FGS<br>CASS~~SANYGYT~~~~~FGS<br>CASS~~SASYGYT~~~~~FGS      |  |             |                                                                                                      |  | E-8     | CASS~~SAFYGYT~~~~~FGP<br>CASS~~IVNEQF~~~~~FGP<br>CASS~~IVNEQF~~~~~FGP<br>CASS~~IVNEQF~~~~~FGP        |
|       |                                                                                                       |  |             |                                                                                                      |  | E-9     | CASS~~SVNEAF~~~~~FGQ<br>CASS~~SVNEAF~~~~~FGQ<br>CASS~~SVNEAF~~~~~FGQ<br>CASS~~LSTAEAF~~~~~FGQ        |
|       |                                                                                                       |  |             |                                                                                                      |  | E-10    | CASS~~SANYGYT~~~~~FGS<br>CASS~~SANYGYT~~~~~FGS<br>CASS~~SANYGYT~~~~~FGS<br>CASS~~FANYGYT~~~~~FGS     |
|       |                                                                                                       |  |             |                                                                                                      |  | E-11    | CASS~~SVNEAF~~~~~FGQ<br>CASS~~SVNEAF~~~~~FGQ<br>CASS~~SVNEAF~~~~~FGQ<br>CASS~~SVNEAF~~~~~FGQ         |
